1 **Virulence constrains transmission even in the absence of a genetic trade-off**

2

3 **Authors**

4 Diogo P. Godinho\*<sup>1</sup>, Leonor R. Rodrigues<sup>1</sup>, Sophie Lefevre<sup>2</sup>, Laurane Delteil<sup>2</sup>, André F. Mira<sup>1</sup>,  
5 Inês R. Fragata<sup>1</sup>, Sara Magalhães<sup>1,3</sup>† and Alison B. Duncan<sup>2</sup>†

6

7 **Affiliations**

8 1. cE3c: Centre for Ecology, Evolution, and Environmental Changes, Faculty of Sciences,  
9 University of Lisbon, Edifício C2, 3<sup>o</sup> piso, 1749-016 Lisboa, Portugal

10 2. Institut des Sciences de l'Évolution, Université de Montpellier, CNRS, IRD, EPHE, CC065,  
11 Place Eugène Bataillon, 34095 Montpellier Cedex 05, France

12 3. Departamento de Biologia Animal, Faculdade de Ciências da Universidade de Lisboa

13 \*Correspondence to: diogoprinogodinho@gmail.com

14 †(equal last author)

15

16 **Abstract**

17 The virulence-transmission trade-off predicts that parasite fitness peaks at intermediate virulence.  
18 However, whether this relationship is driven by the environment or genetically determined and if it  
19 depends on transmission opportunities remains unclear. We tackled these issues using inbred  
20 lines of the macro-parasitic spider-mite *Tetranychus urticae*. When transmission was not possible  
21 during the infection period, we observed a hump-shaped relationship between virulence and  
22 parasite fitness, as predicted by theory. This was environmentally driven, as no genetic  
23 correlation between traits was detected. However, when transmission to uninfected hosts  
24 occurred during the infection period, virulence was positively, environmentally and genetically  
25 correlated with parasite fitness. Therefore, the virulence-transmission trade-off depends on  
26 within-host dynamics and on the timing of transmission, rather than on a genetic correlation. This  
27 fundamental correlation may thus be easier to manipulate than previously thought.

28

## 29 Introduction

30 Virulence, the harm inflicted by parasites on their hosts, is a trait with high relevance for human,  
31 animal, plant and ecosystem health. It is also an evolutionary puzzle, as by harming hosts,  
32 parasites seemingly jeopardize their chances of being represented in subsequent generations,  
33 that is, their fitness (Alizon et al., 2009).

34 The most widely accepted explanation for the existence of virulent parasites is the  
35 virulence-transmission trade-off hypothesis (Alizon et al., 2009; Anderson and May, 1982).  
36 According to this hypothesis, within-host growth is a component of parasite fitness (its  
37 reproductive growth rate,  $R_0$ ), but this is expected to entail high levels of virulence. High  
38 virulence, in turn, may lead to premature host death, hampering transmission, thus ultimately the  
39 growth of parasite populations (Anderson and May, 1982, 1979). Therefore, parasite fitness is  
40 expected to be maximised at intermediate virulence levels (Anderson and May, 1982). Despite  
41 the centrality of this hypothesis to the understanding of host-parasite interactions, and evidence  
42 of genetic variance for parasite traits (Little et al., 2008; Louhi et al., 2013; Mackinnon and Read,  
43 1999a), whether the trade-off is due to genetic correlations among traits or is environmentally  
44 driven remains to be addressed. Disentangling these alternative possibilities is key to identify the  
45 conditions under which parasite traits can evolve independently, which could be applied on  
46 strategies for the management of parasite virulence.

47 Most studies in support of the trade-off hypothesis have used parasite isolates that differ  
48 genetically, but also in their recent ecological and evolutionary history, as they have different  
49 geographic origins (de Roode et al., 2008; Doumayrou et al., 2013; Ebert, 1994; Mackinnon and  
50 Read, 2003; Mackinnon and Read, 1999b). This may lead to spurious correlations between traits.  
51 Using inbred lines derived from the same parasite population allows this issue to be overcome.  
52 Additionally, most studies address the trade-off hypothesis by measuring transmission (or a proxy  
53 thereof) at the end of the infection period (Acevedo et al., 2019; Mackinnon and Read, 2003;  
54 Mackinnon and Read, 1999b), which mimics a parasite with a single transmission event.  
55 However, several parasites transmit continuously during the infection period (e.g. HIV, malaria  
56 (Fraser et al., 2007; Mackinnon and Read, 1999b)), and this may affect the relationship between  
57 virulence and transmission (Day et al., 2011). Therefore, addressing the generality of the  
58 virulence-transmission trade-off requires accounting for these different parasite life cycles.

59 Here, we tested whether the virulence-transmission trade-off was determined by genetic  
60 correlations and/or was environmentally driven using 15 inbred lines derived from one outbred  
61 population of the spider mite *Tetranychus urticae*, a plant macro-parasite (Godinho et al., 2020).  
62 Spider mites spend their entire life-cycle on their host plants (Helle and Sabelis, 1985) causing  
63 damage that correlates negatively with plant fitness (Fineblum and Rausher, 1995). This damage

64 is visible and quantifiable through chlorotic lesions on the leaf surface ((Mira et al., 2021); Figure  
65 S1), which represents a reliable measure of virulence. Once mites become adult and mate,  
66 females either remain on the plant or they disperse and infect new hosts (Bitume et al., 2013).  
67 Spider mites have ambulatory and passive aerial dispersal, hence transmission can depend on  
68 environmental factors such as wind (Smitley and Kennedy, 1985). They can transmit during the  
69 infection period or overexploit the host plant before transmission occurs (Smitley and Kennedy,  
70 1985). Transmission may, thus, be dependent on many factors such as within-host parasite  
71 density and/or the availability of suitable hosts to infect (Bitume et al., 2013; De Roissart et al.,  
72 2015), making this system ideal to test if such factors affect the virulence-transmission trade-off.  
73 Because mites are macro-parasites, we used the number of adult daughters produced in a host  
74 as a measure of parasite fitness,  $R_0$  (Anderson et al., 1986; May and Anderson, 1979). We  
75 assessed whether a relationship between virulence and  $R_0$  was determined by genetic  
76 differences among lines, and/or by the build-up of density-dependence within the host, by varying  
77 initial densities of infesting mites (infection dose). Additionally, we evaluated whether this  
78 relationship was affected by opportunities for transmission during the infection period in two  
79 separate experiments. In the first, all parasite life-history traits were measured on a single host  
80 patch and no transmission was allowed until the end of the infection period. In the second, the  
81 adult female offspring of the parasite could disperse continuously during the infection period to a  
82 new host patch.

## 83 **Results**

### 84 Genetic variation for virulence, $R_0$ and transmission

85 If the virulence-transmission trade-off is to be driven by genetic correlations among parasite traits,  
86 genetic variance for these traits must be present in a parasite population. We thus measured the  
87 variance for virulence, parasite fitness and transmission among the *T. urticae* inbred lines, using  
88 per capita measurements, which allows broad sense heritability,  $H^2$ , to be determined. We found  
89 significant genetic variance for all traits (Fig. S2). Additionally, all traits were affected by the initial  
90 density of founding females on the host patch. The exception was for per capita transmission to  
91 new host patches (in the experiment with continuous transmission) (Table S1). Broad sense  
92 heritability was significant for all traits measured, with levels similar among experiments (Table  
93 S2).

### 95 Genetic and environmental correlations between parasite traits

#### 96 *Virulence and $R_0$ , transmission at the end of the infection period*

97 We first assessed virulence and  $R_0$  in the absence of uninfected hosts to which parasites could  
98 transmit (i.e., mimicking a parasite life cycle with transmission at the end of the infection period

99 only; Fig. S3): we infected hosts (bean leaf patches) with 5, 10 or 20 females from each inbred  
100 line for 4 days, then measured damage (virulence) and the number of females produced 10 days  
101 later ( $R_0$ ). In support of the trade-off hypothesis, we found a hump-shaped environmental  
102 relationship (resulting from the residual co-variance of the model only) between virulence and  $R_0$ .  
103 This was shown by the model with a squared term between these traits having a lower DIC, as  
104 compared to the model with only the linear term (DIC = 3379 and 3382, respectively). The model  
105 with the lowest DIC included density, hence this factor affected trait correlations. This was  
106 corroborated by the analysis of trait correlations for each density separately, as we found a  
107 positive correlation at low density, no relationship at intermediate density, and a negative  
108 correlation at high density (Fig. 1a, Table S3). This suggests that the relationship between these  
109 traits is modulated by density dependence: beyond a certain level of virulence, within-host  
110 competition prevents more daughters from becoming adult, such that  $R_0$  is maximised at  
111 intermediate levels of virulence, as predicted by the trade-off hypothesis. We observed that  
112 females at higher densities do not lay fewer eggs (results not shown), suggesting that density-  
113 dependence operates during juvenile development. Evidence for density-dependence has been  
114 found in this (De Roissart et al., 2015; Rotem and Agrawal, 2003), and other host-parasite  
115 systems (Ebert et al., 2000; Pollitt et al., 2013).

116

117 *Virulence,  $R_0$  and transmission to uninfected hosts, continuous transmission*

118 Next, for the two highest densities (10 and 20 females), we tested whether the presence of  
119 uninfected hosts (i.e. mimicking a parasite life cycle with continuous transmission during the  
120 infection period, Fig. S3) would modify the relationship between virulence and  $R_0$ . Despite no  
121 overall environmental correlation between virulence and  $R_0$ , this correlation was positive at both  
122 intermediate and high densities (Table S3; Fig. 1b). This suggests that the negative effects of  
123 high densities on  $R_0$  were alleviated by the possibility of moving to other hosts. Additionally, this  
124 correlation was affected by the inbred line identity, indicating that it has a genetic basis. Probably,  
125 in these conditions, more virulent genotypes suffer less from rapid host exploitation, because they  
126 can escape to new hosts. Moreover, we found a positive correlation between  $R_0$  and transmission  
127 to uninfected hosts (Table S3; Fig. 2), which is in accordance with theory (Anderson and May,  
128 1982).

129

## 130 **Discussion**

131 In this study we show a hump-shaped relationship between virulence and transmission that does  
132 not have a genetic basis. Indeed,  $R_0$  is maximized at intermediate levels of virulence, as  
133 postulated in theoretical models (Anderson and May, 1982, 1979), but this is due to within-host  
134 density dependence. Moreover, this hump-shaped relationship disappears when transmission is

135 continuous during the infection period. This may explain the mixed evidence for the occurrence of  
136 a trade-off in earlier studies and reinforces the idea of including the whole parasite life-cycle in the  
137 experimental set-up (Acevedo et al., 2019; Alizon and Michalakis, 2015). Indeed, if transmission  
138 timing affects the relationship between virulence and  $R_0$ , failing to include this important step of  
139 the parasite life cycle in the experimental set-up may lead to conclusions based on incomplete  
140 evidence. Contrasting relationships between virulence and  $R_0$  reliant on transmission timings may  
141 have important consequences for ecology and evolution for parasites of the same or different  
142 species.

143 In parasites with transmission at the end of the infection period, the lack of a genetic  
144 correlation between virulence and  $R_0$  means that selection in one trait may not affect the other,  
145 potentially maintaining variance for both traits, as observed in this (Fig. S2) and other systems  
146 (Dutta et al., 2021; Little et al., 2008; Louhi et al., 2013; Mackinnon and Read, 1999a). This may  
147 enhance the ability to cope with variability in host populations (Dutta et al., 2021; Nørgaard et al.,  
148 2021), which is particularly relevant for generalist parasites, such as *T. urticae*. In the absence of  
149 a genetic link with virulence, transmission may instead vary with other factors such as host  
150 availability and variability (King and Lively, 2012; Parsche and Lattorff, 2018). Conversely,  
151 selection on virulence may depend on other epidemiologically related traits, such as co-infections  
152 or the host immune system (Alizon et al., 2009). In parasites with continuous transmission, the  
153 positive genetic correlation between virulence and  $R_0$  suggests there should be selection for  
154 higher virulence. If this is the case, why then do we still find genetic variance for this trait? We  
155 propose two non-mutually exclusive hypotheses. First, *T. urticae* is a generalist parasite, hence  
156 optimal virulence may vary with the host species (Rioja et al., 2017). Second, transmission within  
157 the infection period relies on the occurrence of hosts to which parasites can transmit. This is not  
158 necessarily always possible, as uninfected hosts may be locally absent or they may become  
159 rapidly infested (Crossan et al., 2007; Hochberg, 1991). Although mites may be passive  
160 dispersers, they base their decision to leave a host patch on their perception of cues (volatiles)  
161 from hosts in the environment, including their infection status (Kiedrowicz et al., 2017; Pallini et  
162 al., 1997). Therefore, if there are no uninfected hosts mites may remain on their host, which will  
163 eventually result in them switching to a parasite life cycle without continuous transmission. Thus,  
164 variability in transmission timing, may contribute to the maintenance of genetic variance for  
165 virulence.

166 The difference in parasite life cycles analyzed here has obvious implications for the  
167 virulence-transmission trade-off that have not been shown empirically before. Still, our  
168 experimental design did not include variation in the availability and/or heterogeneity of recipient  
169 hosts. Considering these host population characteristics would further contribute to our

170 knowledge about how differences in parasite life cycles may affect the virulence-transmission  
171 trade-off and, therefore, influence disease dynamics.

172

## 173 **Materials and Methods**

### 174 Biological system

175 *Tetranychus urticae* is an ectoparasite of over 1000 host plant species (Rioja et al., 2017).  
176 Females lay eggs on the leaf surface that hatch up to 4 days later. There are three immature  
177 stages, punctuated by quiescent stages, after which the mites become adult (~9 days from  
178 hatching to adulthood in our laboratory), with their complete life cycle occurring on their host plant  
179 (Helle and Sabelis, 1985). They feed by injecting their stylet into plant cells, mostly parenchyma  
180 cells, and sucking out the cytoplasm, producing chlorotic lesions in the form of white spots ((Mira  
181 et al., 2021), Figure S1). The damage inflicted by *T. urticae* (our measure of virulence), together  
182 with high intrinsic growth rates, has important consequences for plant growth and yield, resulting  
183 in major economic losses worldwide (Helle and Sabelis, 1985).

184

### 185 Populations used

186 *Tetranychus urticae* were collected on different host plants, in Portugal in 2013 (Zélé et al., 2018),  
187 and have since been reared on bean plants (*Phaseolus vulgaris*, variety Prelude), at the  
188 University of Lisbon. In October 2015, 50 individuals from 6 different field populations (total: 300)  
189 were collected and mixed to form an outbred population that has been kept at high densities  
190 (>1000). In October 2016, inbred lines were created from this population by sib mating. This  
191 procedure was repeated for 14 generations, ensuring an inbreeding coefficient above 94%  
192 (Godinho et al., 2020). Inbred lines allow simultaneous measurement of many individuals of the  
193 same (nearly) homozygous genotype, thus increasing the accuracy of genetic estimates  
194 (Godinho et al., 2020). Because they were derived from the same population, all lines share the  
195 same evolutionary and environmental history. Additionally, given that this population was outbred,  
196 genetic variation across lines is expected to be high (Godinho et al., 2020). Lines were  
197 maintained separately on bean leaf patches in Petri dishes. A subset of 15 inbred lines were  
198 transferred to the University of Montpellier in January 2018 and maintained on bean leaves  
199 (variety Pongo) in small plastic boxes (255 mm length x 183 mm width x 77 mm height) at optimal  
200 conditions (25°C with a 16:8 L: D cycle, at 60% relative humidity). These same conditions were  
201 kept throughout all experiments.

202 Prior to the experiments, cohorts of spider mites from each inbred line were created by  
203 isolating 40 to 50 mated females of each line on bean leaves placed on water-saturated cotton  
204 wool in boxes. These females laid eggs for 48h. Fourteen days later, mated females (daughters)

205 were used in the experiments. Not all inbred lines are represented in each experiment due to too  
206 few individuals available at the start of the experiment (N between 12 to 14 lines).

207

#### 208 Virulence and $R_0$ transmission at the end of the infection period

209 Females of each inbred line were randomly assigned to a low, intermediate or high-density  
210 treatment, corresponding to 5, 10 or 20 founding females, respectively, on a 4 cm<sup>2</sup> bean leaf  
211 patch, placed on wet cotton wool in plastic boxes. All females were allowed to feed and lay eggs  
212 on their leaf patches for 4 days. After this period, adult females were killed, and a photograph of  
213 each patch was taken using a Canon EOS 70D camera. The amount of damage inflicted by  
214 spider mites was measured using ImageJ (Schneider et al., 2012) and Ilastik 1.3 (Sommer et al.,  
215 2011). Briefly, the background from each photo was removed in ImageJ, then we distinguished  
216 damaged area from healthy leaf using Ilastik and finally the damaged area was calculated using  
217 the colour contrast between damaged and undamaged leaf tissue in ImageJ (Fig. S1, (Mira et al.,  
218 2021)). Control leaf patches, never exposed to spider mites, were placed in the experimental  
219 boxes for the same time period and photographed. These were used to establish an average  
220 baseline “damage”, which was subtracted from each measurement, to provide an estimate of  
221 virulence. After a period of 14 days, the adult daughters surviving on each patch were counted. In  
222 this set-up, transmission would only be possible after this measurement, i.e., at the end of the  
223 infection period. There were 3 to 13 replicates for each inbred line per density, distributed across  
224 3 blocks.

225

#### 226 Virulence, $R_0$ and transmission to uninfected hosts, continuous transmission

227 Adult females were randomly assigned to the intermediate or the high-density treatments (10 or  
228 20 females, respectively, on a 4 cm<sup>2</sup> bean leaf patch placed on water saturated cotton wool). As  
229 in the previous experiment, females were left to lay eggs for 4 days, after which they were killed,  
230 and a photograph was taken of each leaf to measure the damage inflicted (Fig. S1). On day 4, a  
231 second leaf patch, uninfected by spider-mites, was placed beside the first and connected to it by  
232 a 3 x 1 cm Parafilm bridge (Fig. S3). In this way, the emerging adult female offspring could walk  
233 across this bridge and infect a new leaf patch. The number of adult daughters on the new host  
234 patches was checked on days 11, 12 and 13 (in block 1 only on days 12 and 13). When there  
235 were more than 15 offspring on the new patch, the latter was replaced by a new one. Host  
236 patches were replaced so that uninfected patches were always available. On day 14, we counted  
237 the number of adult daughters on the original host patch and on each of the new patches.  
238 Transmission was inferred by the cumulative number of females that infected a new host patch.  
239 This set-up mimics the life cycle of a parasite with continuous transmission during the infection  
240 period, as found in several systems (Fraser et al., 2007; Mackinnon and Read, 1999b). There  
241 were 5 to 16 replicates for each inbred line per density treatment, distributed across 4 blocks.

242

243 Statistical analysis

244 We present correlations between *T. urticae* life-history traits: damage inflicted (a measure of  
245 virulence), adult daughters produced (a measure of  $R_0$  for macro-parasites (Anderson et al.,  
246 1986; Anderson and May, 1979)) and the number of females infecting a new host (a measure of  
247 transmission). We consider total values per host patch (Table S3), which are generally used in  
248 theoretical models (Anderson et al., 1986; Anderson and May, 1982; Day et al., 2011; May and  
249 Anderson, 1979) and correspond to the traits measured in most experimental studies testing  
250 virulence-transmission correlations (de Roode et al., 2008; Doumayrou et al., 2013; Mackinnon  
251 and Read, 2003, 1999b). Genetic and environmental correlations between virulence and  $R_0$ , and  
252 between  $R_0$  and transmission in the experimental set-up mimicking continuous transmission,  
253 were performed using a multi-response generalized linear mixed model fitted with an MCMCglmm  
254 (package MCMCglmm (Hadfield, 2010)). Genetic correlations were determined by including the  
255 identity of the line as a random factor in each model and assessing the highest posterior density  
256 interval (HPDI) of the genetic (G) structure of the model, which represents the (co)variances  
257 between the two traits evaluated across inbred lines (Hadfield, 2010). Environmental correlations  
258 were obtained by assessing the HPDI of the residual (R) structure in the same model (Hadfield,  
259 2010). Effects were considered significant when the HPDI did not overlap with 0. The effect of  
260 density on each correlation was assessed by comparing the deviance information criterion (DIC)  
261 of the models including density as a fixed factor or not. We also report the genetic and  
262 environmental correlations when considering each density level separately (Table S3). In  
263 addition, we tested whether a non-linear regression might best describe the environmental  
264 relationship between virulence and  $R_0$  in the experiment mimicking transmission at the end of the  
265 infection period only. To this aim, we compared two MCMCglmm models both with  $R_0$  fitted as the  
266 response variable and inbred line and block as random factors. Both models included density as  
267 a fixed factor and virulence as a covariate, with one model including only the linear term for  
268 virulence and the other both the linear and the quadratic terms.

269 For the assessment of genetic variance (variance among inbred lines) and the effect of  
270 density on this variance we used per capita values, by dividing the value for each host patch by  
271 the initial density of females, as these values are more representative of individual variation (Fig.  
272 S2, Table S2). We then applied generalized linear mixed models fitted with a Markov Monte Carlo  
273 Chain approach (Hadfield, 2010). Broad-sense heritability,  $H^2 = \frac{Var(G)}{Var(G)+Var(E)}$  (Falconer and  
274 Mackay, 1996) and the corresponding confidence intervals were extracted from the  
275 abovementioned models for each trait.

276 All models initially included 300000 iterations, with a burn-in of 10000 iterations, thinning of  
277 100 and a flat prior: For GLMMs (to assess the genetic variance within a trait),  $V=1$  and



278 nu=0.002; For Multi-response GLMMs (to assess trait correlations),  $V = \text{matrix}(c(1,0,0,1), \text{ncol}= 2,$   
279  $\text{nrow}= 2)$  and nu= 0.002. Flat priors were used to allow the hyper-parameter values to reflect a  
280 reasonable range of values for the traits in question, without any previous information about them  
281 or their co-variance. All models were checked for convergence with a stationary test using the  
282 heidel.diag function and for autocorrelations for the Markov chain within fixed and random terms  
283 using the autocorr.diag function. When models failed one of these tests, the number of iterations  
284 was increased to 500000 or to 700000 and the burn-in to 20000 or 50000. All figures were  
285 produced with the ggplot2 package in R and the regressions included were fitted with the  
286 geom\_smooth function (Wickham and Winston, 2016).

287  
288

### **Acknowledgments**

289 We deeply thank Élio Sucena, Flore Zélé, Margarida Matos, Oliver Kaltz, Sylvain Gandon and  
290 Yannis Michalakis, for their very useful suggestions and comments.

### **Funding**

292 ERC (European Research Council) consolidator grant COMPCON, GA 725419 attributed to SM,  
293 PHC-PESSOA grant (38014YC) to ABD and SM, and FCT (Fundação para Ciência e Tecnologia)  
294 PhD scholarship PD/BD/114010/2015 to DPG; This is ISEM contribution no XXXX.

### **Author contributions**

296 Conceptualization and supervision by SM and ABD; Investigation by DPG, ABD, LRR, SL, AFM  
297 and LD; Formal analysis by DPG and IRF; Visualization by DG, LRR and IRF; Writing the original  
298 draft by DPG, SM and ABD with reviewing and editing by LRR and IRF.  
299

### **Competing interests**

301 Authors declare no competing interests.

### **Data and materials availability**

303 Data will be deposited in Figshare upon acceptance.

304  
305

### **References**

- 307 Acevedo MA, Dilleuth FP, Flick AJ, Faldyn MJ, Elder BD. 2019. Virulence-driven trade-offs in  
308 disease transmission: A meta-analysis\*. *Evolution (N Y)* **73**:636–647.  
309 doi:10.1111/evo.13692
- 310 Alizon S, Hurford A, Mideo N, Van Baalen M. 2009. Virulence evolution and the trade-off  
311 hypothesis: History, current state of affairs and the future. *J Evol Biol* **22**:245–259.  
312 doi:10.1111/j.1420-9101.2008.01658.x
- 313 Alizon S, Michalakis Y. 2015. Adaptive virulence evolution: The good old fitness-based approach.  
314 *Trends Ecol Evol* **30**:248–254. doi:10.1016/j.tree.2015.02.009
- 315 Anderson RM, May RM. 1982. Coevolution of hosts and parasites. *Parasitology* **85**:411–426.  
316 doi:10.1017/S0031182000055360

- 317 Anderson RM, May RM. 1979. Population biology of infectious diseases: Part I. *Nature* **280**:361–  
318 367.
- 319 Anderson RM, May RM, Joysey K, Mollison D, Conway GR, Cartwell R, Thompson H V., Dixon B.  
320 1986. The invasion, persistence and spread of infectious diseases within animal and plant  
321 communities. *Philos Trans R Soc Lond B Biol Sci* **314**:533–570. doi:10.1098/rstb.1986.0072
- 322 Bitume E V., Bonte D, Ronce O, Bach F, Flaven E, Olivieri I, Nieberding CM. 2013. Density and  
323 genetic relatedness increase dispersal distance in a subsocial organism. *Ecol Lett* **16**:430–  
324 437. doi:10.1111/ele.12057
- 325 Crossan J, Paterson S, Fenton A. 2007. Host availability and the evolution of parasite life-history  
326 strategies. *Evolution (N Y)* **61**:675–684. doi:10.1111/j.1558-5646.2007.00057.x
- 327 Day T, Alizon S, Mideo N. 2011. Bridging scales in the evolution of infectious disease life  
328 histories: Theory. *Evolution (N Y)* **65**:3448–3461. doi:10.1111/j.1558-5646.2011.01394.x
- 329 De Roissart A, Wang S, Bonte D. 2015. Spatial and spatiotemporal variation in metapopulation  
330 structure affects population dynamics in a passively dispersing arthropod. *J Anim Ecol*  
331 **84**:1565–1574. doi:10.1111/1365-2656.12400
- 332 de Roode JC, Yates AJ, Altizer S. 2008. Virulence-transmission trade-offs and population  
333 divergence in virulence in a naturally occurring butterfly parasite. *Proc Natl Acad Sci U S A*  
334 **105**:7489–7494. doi:10.1073/pnas.0710909105
- 335 Doumayrou J, Avellan A, Froissart R, Michalakakis Y. 2013. An experimental test of the  
336 transmission-virulence trade-off hypothesis in a plant virus. *Evolution (N Y)* **67**:477–486.  
337 doi:10.1111/j.1558-5646.2012.01780.x
- 338 Dutta A, Croll D, McDonald BA, Barrett LG. 2021. Maintenance of variation in virulence and  
339 reproduction in populations of an agricultural plant pathogen. *Evol Appl* **14**:335–347.  
340 doi:10.1111/eva.13117
- 341 Ebert D. 1994. Virulence and local adaptation of a horizontally transmitted parasite. *Science (80-  
342 )* **265**:1084–1086.
- 343 Ebert D, Zschokke-Rohringer CD, Carius HJ. 2000. Dose effects and density-dependent  
344 regulation of two microparasites of *Daphnia magna*. *Oecologia* **122**:200–209.  
345 doi:10.1007/PL00008847
- 346 Falconer DS, Mackay TFC. 1996. Introduction to Quantitative Genetics. Harlow: Longman.
- 347 Fineblum W, Rausher M. 1995. Tradeoff between resistance and tolerance to herbivore damage  
348 in a morning glory. *Nature* **377**:517–520.
- 349 Fraser C, Hollingsworth TD, Chapman R, De Wolf F, Hanage WP. 2007. Variation in HIV-1 set-  
350 point viral load: Epidemiological analysis and an evolutionary hypothesis. *Proc Natl Acad  
351 Sci U S A* **104**:17441–17446. doi:10.1073/pnas.0708559104
- 352 Godinho DP, Cruz MA, Charlery de la Masselière M, Teodoro-Paulo J, Eira C, Fragata I,  
353 Rodrigues LR, Zélé F, Magalhães S. 2020. Creating outbred and inbred populations in  
354 haplodiploids to measure adaptive responses in the laboratory. *Ecol Evol* **10**:7291–7305.  
355 doi:10.1002/ece3.6454
- 356 Hadfield JD. 2010. MCMC methods for multi-response generalized linear mixed models: The  
357 MCMCglmm R package. *J Stat Softw* **33**:1–21.

- 358 Helle W, Sabelis MW. 1985. Spider mites: Their biology, natural enemies and control, Control.  
359 Amsterdam: Elsevier.
- 360 Hochberg ME. 1991. Non-linear transmission rates and the dynamics of infectious disease. *J*  
361 *Theor Biol* **153**:301–321.
- 362 Kiedrowicz A, Kuczyński L, Lewandowski M, Proctor H, Skoracka A. 2017. Behavioural  
363 responses to potential dispersal cues in two economically important species of cereal-  
364 feeding eriophyid mites. *Sci Rep* **7**:1–9. doi:10.1038/s41598-017-04372-7
- 365 King KC, Lively CM. 2012. Does genetic diversity limit disease spread in natural host  
366 populations? *Heredity (Edinb)* **109**:199–203.
- 367 Little TJ, Chadwick W, Watt K. 2008. Parasite variation and the evolution of virulence in a  
368 Daphnia- microparasite system. *Parasitology* **135**:303–308.  
369 doi:10.1017/S0031182007003939
- 370 Louhi KR, Karvonen A, Rellstab C, Jokela J. 2013. Genotypic and phenotypic variation in  
371 transmission traits of a complex life cycle parasite. *Ecol Evol* **3**:2116–2127.  
372 doi:10.1002/ece3.621
- 373 Mackinnon M, Read A. 2003. The effects of host immunity on virulence-transmissibility  
374 relationships in the rodent malaria parasite *Plasmodium chabaudi*. *Parasitology* **126**:103–  
375 112. doi:10.1017/S003118200200272X
- 376 Mackinnon M, Read A. 1999a. Selection for high and low virulence in the malaria parasite  
377 *Plasmodium chabaudi*. *Proc R Soc B Biol Sci* **266**:741–748. doi:10.1098/rspb.1999.0699
- 378 Mackinnon M, Read A. 1999b. Genetic relationships between parasite virulence and transmission  
379 in the rodent malaria *Plasmodium chabaudi*. *Evolution (N Y)* **53**:689. doi:10.2307/2640710
- 380 May RM, Anderson RM. 1979. Population biology of infectious diseases: Part II. *Nature* **280**:455–  
381 461. doi:10.1038/280455a0
- 382 Mira AF, Marques LM, Magalhães S, Rodrigues LR. 2021. A method to measure the damage  
383 caused by cell-sucking herbivores. *Methods Mol Biol* **in press**.
- 384 Nørgaard LS, Zilio G, Saade C, Gougat-Barbera C, Hall MD, Fronhofer EA, Kaltz O. 2021. An  
385 evolutionary trade-off between parasite virulence and dispersal at experimental invasion  
386 fronts. *Ecol Lett* **24**:739–750. doi:10.1111/ele.13692
- 387 Pallini A, Janssen A, Sabelis MW. 1997. Odour-mediated responses of phytophagous mites to  
388 conspecific and heterospecific competitors. *Oecologia* **110**:179–185.  
389 doi:10.1007/s004420050147
- 390 Parsche S, Lattorff HMG. 2018. The relative contributions of host density and genetic diversity on  
391 prevalence of a multi-host parasite in bumblebees. *J Linn Soc* **125**:900–910.
- 392 Pollitt LC, Churcher TS, Dawes EJ, Khan SM, Sajid M, Basáñez MG, Colegrave N, Reece SE.  
393 2013. Costs of crowding for the transmission of malaria parasites. *Evol Appl* **6**:617–629.  
394 doi:10.1111/eva.12048
- 395 Rioja C, Zhurov V, Bruinsma K, Grbic M, Grbic V. 2017. Plant-herbivore interactions: A case of an  
396 extreme generalist, the two-spotted spider mite *Tetranychus urticae*. *Mol Plant-Microbe*  
397 *Interact* **30**:935–945. doi:10.1094/MPMI-07-17-0168-CR
- 398 Rotem KA, Agrawal AA. 2003. Density dependent population growth of the two-spotted spider

- 399 mite, *Tetranychus urticae*, on the host plant *Leonurus cardiaca*. *Oikos* **103**:559–565.  
400 doi:10.1034/j.1600-0706.2003.12531.x
- 401 Schneider CA, Rasband WS, Eliceiri KW. 2012. ImageJ. *Nat Methods* **9**:671–675.  
402 doi:10.1007/978-1-84882-087-6\_9
- 403 Smitley DR, Kennedy GG. 1985. Photo-oriented aerial-dispersal behavior of *Tetranychus urticae*  
404 (Acari: Tetranychidae) enhances escape from the leaf surface. *Ann Entomol Soc Am*  
405 **78**:609–614. doi:10.1093/aesa/78.5.609
- 406 Sommer C, Straehle C, Kothe U, Hamprecht FA. 2011. Ilastik: Interactive learning and  
407 segmentation toolkit. *Proc - Int Symp Biomed Imaging* 230–233.  
408 doi:10.1109/ISBI.2011.5872394
- 409 Wickham H, Winston C. 2016. Ggplot2: Elegant graphics for data analysis., 2nd ed. Cham:  
410 Springer International Publishing. doi:10.1093/bioinformatics/btr406
- 411 Zélé F, Santos I, Olivieri I, Weill M, Duron O, Magalhães S. 2018. Endosymbiont diversity and  
412 prevalence in herbivorous spider mite populations in South-Western Europe. *FEMS*  
413 *Microbiol Ecol* **94**:fiy015. doi:10.1093/femsec/fiy015
- 414

415 **Figure 1.**

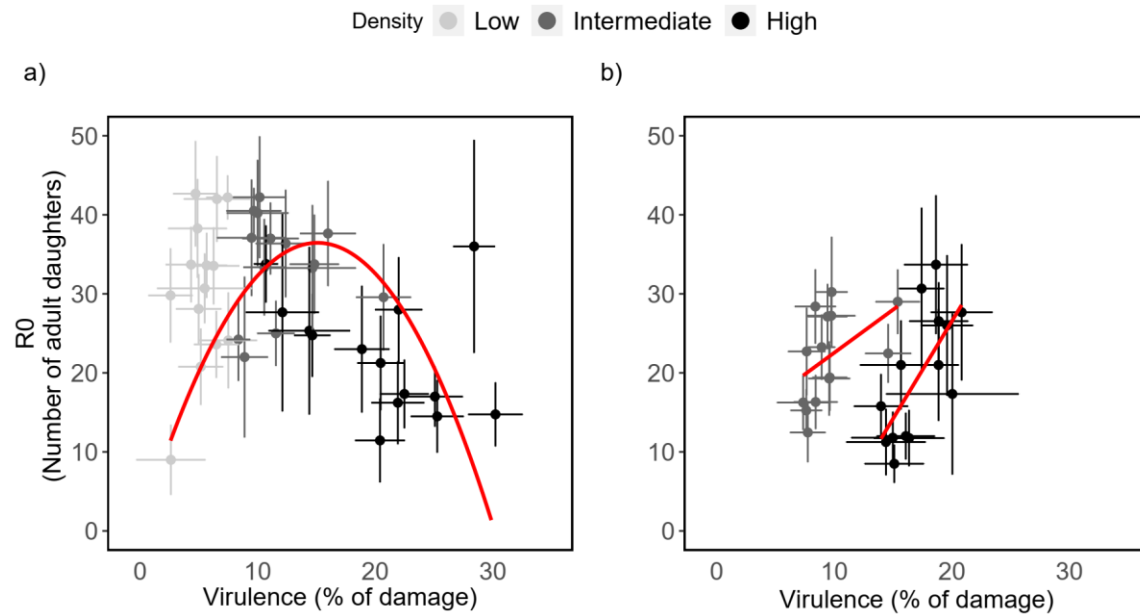

416

417 **Figure 1. Correlation between virulence and the production of adult daughters in inbred**  
418 **lines of *T. urticae* infecting a host patch.** The damage inflicted on the host patch (i.e.,  
419 virulence) and the number of daughters produced (the parasite reproductive rate  $R_0$ ) were  
420 measured in a set-up with a) no uninfected hosts available; b) uninfected hosts available during  
421 the infection period. Shades of grey represent different densities; dots are the mean for each  
422 inbred line  $\pm$  standard error; regressions are represented in red.

423

424 **Figure 2.**

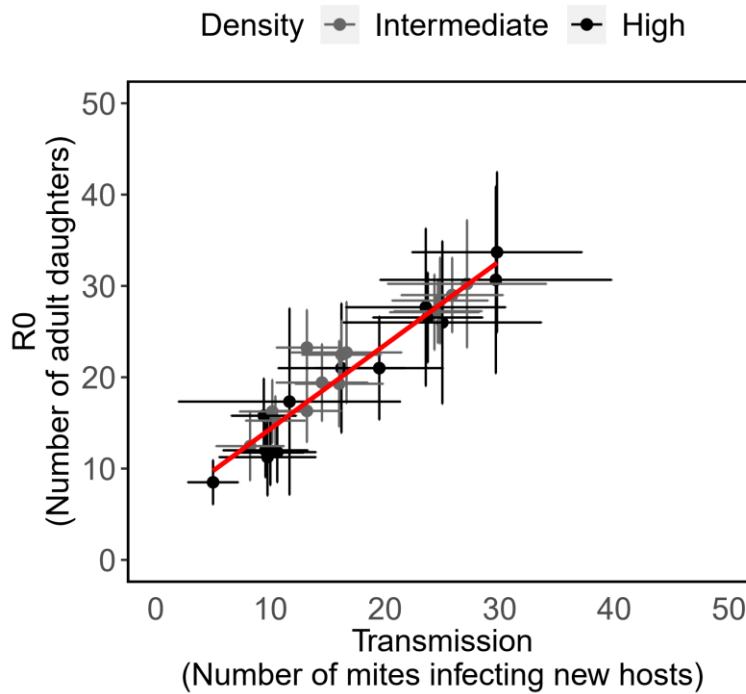

425

426 **Figure 2. Correlation between the production of adult daughters and transmission in**  
427 **inbred lines of *T. urticae* infecting a host patch.** The number of daughters produced (the  
428 parasite reproductive rate,  $R_0$ ) and transmission (the number of mites infecting new hosts) for  
429 inbred lines of *T. urticae* at different starting densities (Intermediate = 10 females; High = 20  
430 females). Shades of grey represent different densities; dots are the mean for each inbred line  $\pm$   
431 standard error; the regression is represented in red.

432

## Supplementary Information for

### “Virulence constrains transmission even in the absence of a genetic trade-off”

#### Authors

Diogo P. Godinho<sup>\*1</sup>, Leonor R. Rodrigues<sup>1</sup>, Sophie Lefevre<sup>2</sup>, Laurane Delteil<sup>2</sup>, André F. Mira<sup>1</sup>, Inês R. Fragata<sup>1</sup>, Sara Magalhães<sup>1,3†</sup> and Alison B. Duncan<sup>2†</sup>

#### Affiliations

1. cE3c: Centre for Ecology, Evolution, and Environmental Changes, Faculty of Sciences, University of Lisbon, Edifício C2, 3º piso, 1749-016 Lisboa, Portugal

2. Institut des Sciences de l'Évolution, Université de Montpellier, CNRS, IRD, EPHE, CC065, Place Eugène Bataillon, 34095 Montpellier Cedex 05, France

3. Departamento de Biologia Animal, Faculdade de Ciências da Universidade de Lisboa

\*Correspondence to: [diogoprinozinho@gmail.com](mailto:diogoprinozinho@gmail.com)

†(equal last author)

#### This file includes:

Figures S1 to S3  
Tables S1 to S3

1

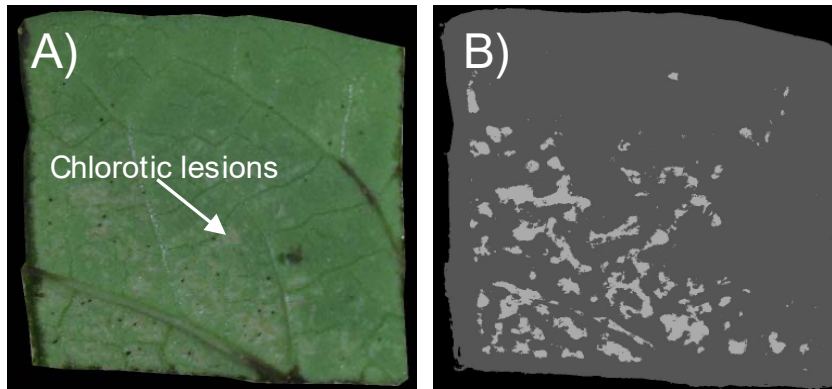

2

3 **Figure S1. Example of a host patch cut from a bean plant (*Phaseolus vulgaris*) upon**  
4 **image acquisition and after software output. A) Leaf damage (chlorotic lesions)**  
5 **caused by *T. urticae* feeding. B) The photograph is transformed into a simple**  
6 **segmentation image using Ilastik 1.3. Areas of leaf are damage shown in light grey and**  
7 **correspond to our measure of virulence.**



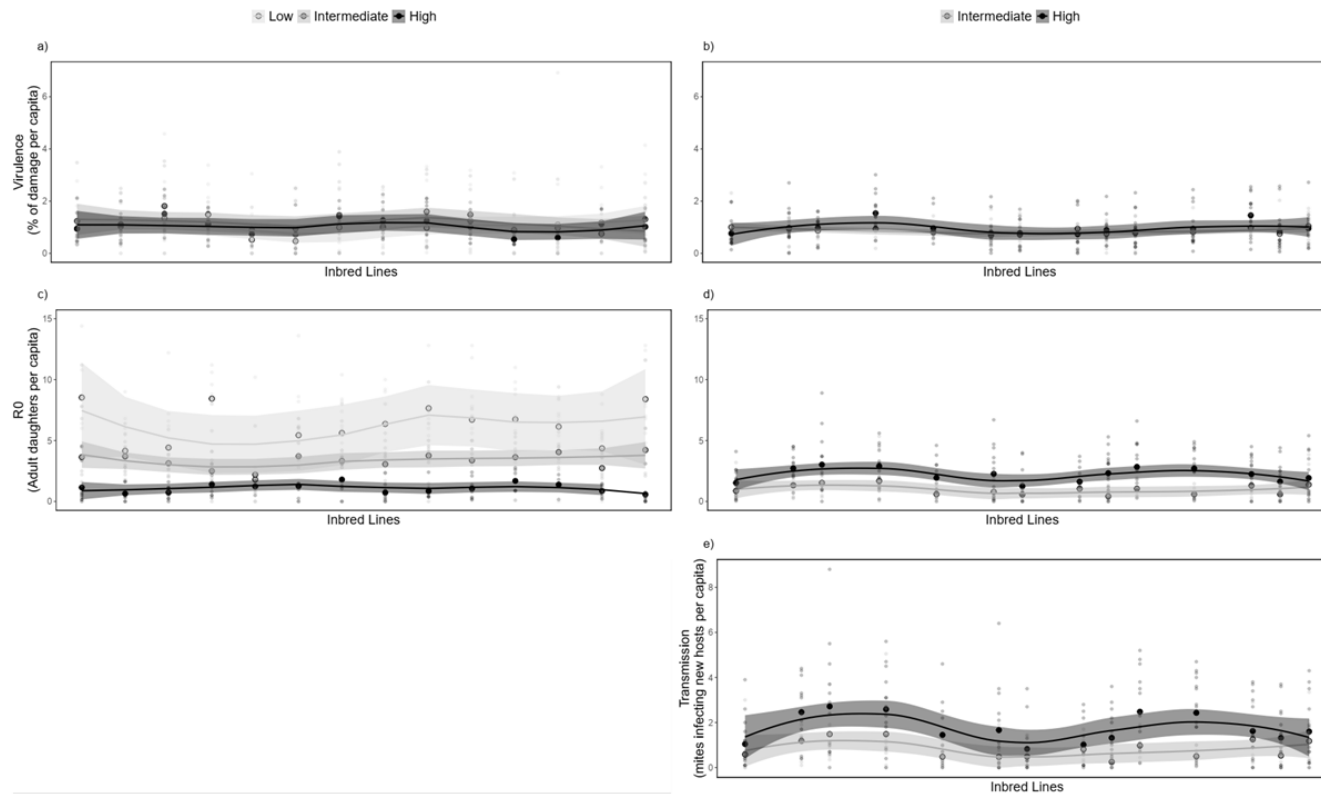

8

9 **Figure S2. Genetic variance.** Genetic variance for virulence (% of damage inflicted; a and b), R<sub>0</sub> (the number of adult daughters; c  
 10 and d), and transmission (number of mites infecting new hosts; e), measured per capita in the different experiments (Experiment 1 – a  
 11 and c; Experiment 2 – b, d, and e). Large circles represent the average per line, per density (light grey = Low density; dark grey =  
 12 Intermediate density; black = High density). The shape of the curve for each density (light grey = Low density; dark grey =  
 13 Intermediate density; black = High density) was calculated using a polynomial regression fitted with the geom\_smooth function.

**1. Virulence and  $R_0$ , transmission at the end of the infection period**

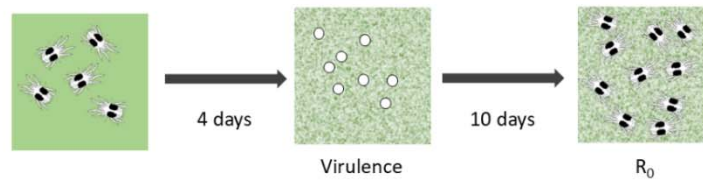

**2. Virulence,  $R_0$  and transmission to uninfected hosts, continuous transmission**

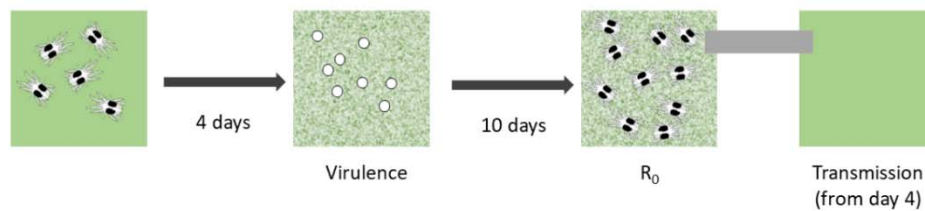

14

15 **Figure S3. Experimental set-ups.** Schematic representation of the experimental set-ups  
16 and the traits that were measured in each experiment. Day 0 shows 5 spider mites on a  
17 healthy 4cm<sup>2</sup> leaf patch (low density treatment). On day 4, virulence (mottled white areas  
18 on leaf patches) was measured in experiments 1 and 2.  $R_0$  (i.e. number of adult daughters)  
19 was measured 14 days after mite installation. In experiment 2 transmission to an  
20 uninfected leaf patch was possible from day 4 to day 14.  
21

22 **Table S1. The effect of the initial density of female spider mites on the patch** on the  
 23 per capita production of adult daughters ( $R_0$ ), virulence and transmission (i.e. “trait” in  
 24 the model column). Deviation information criterion (DIC) of the models (MCMCglmm  
 25 package) measured in the different experiments with density included or not as a fixed  
 26 factor. When applicable, best fit models are in bold. Experiment 1: transmission at the  
 27 end of the infection period only; experiment 2: continuous transmission.

| Trait           | Experiment | Model                                              | DIC         |
|-----------------|------------|----------------------------------------------------|-------------|
| Adult daughters | 1          | trait ~ -1 + random= Line + Block                  | 2070        |
|                 |            | <b>trait ~ -1 + Density + random= Line + Block</b> | <b>1835</b> |
|                 | 2          | trait ~ -1 + random= Line + Block                  | 1217        |
|                 |            | <b>trait ~ -1 + Density + random= Line + Block</b> | <b>1147</b> |
| Virulence       | 1          | trait ~ -1 + random= Line + Block                  | 3019        |
|                 |            | <b>trait ~ -1 + Density + random= Line + Block</b> | <b>2824</b> |
|                 | 2          | trait ~ -1 + random= Line + Block                  | 464         |
|                 |            | <b>trait ~ -1 + Density + random= Line + Block</b> | <b>456</b>  |
| Transmission    | 2          | trait ~ -1 + random = Line + Block                 | 2762        |
|                 |            | trait ~ -1 + Density + random= Line + Block        | 2763        |

28  
 29

30 **Table S2. Trait heritability.** Broad-sense heritability for the per capita production of  
31 adult daughters ( $R_0$ ), virulence and transmission measured in the different experiments.  
32 95% highest posterior density intervals (HPDI) intervals for the heritability of each trait.  
33 All traits have significant heritability as no interval includes zero. Experiment 1:  
34 transmission at the end of the infection period only; experiment 2: continuous  
35 transmission.

| <b>Trait</b>           | <b>Experiment</b> | <b>Heritability</b> | <b>95% HPDI</b> |
|------------------------|-------------------|---------------------|-----------------|
| <b>Adult daughters</b> | 1                 | 0.09                | 0.001, 0.19     |
|                        | 2                 | 0.07                | 0.001, 0.15     |
| <b>Virulence</b>       | 1                 | 0.03                | 0.001, 0.07     |
|                        | 2                 | 0.06                | 0.001, 0.12     |
| <b>Transmission</b>    | 2                 | 0.14                | 0.02, 0.27      |

36

37 **Table S3. Genetic and environmental correlations.** Genetic and environmental correlations - extracted from the genetic (random) or  
 38 residual error structure of the models, respectively - between the production of adult daughters ( $R_0$ ) and virulence or transmission. All  
 39 traits were measured per host (total value). The deviance information criterion (DIC) of models for all data with and without densities  
 40 are shown. Highest posterior density intervals (HPDI) are shown for the model including all data (\* model with lowest DIC, or in the  
 41 case of  $R_0$  vs. transmission, the simplest model), and separately at the different densities. Intervals not overlapping 0 are shown in  
 42 bold. The direction of the correlations is shown in brackets. Experiment 1: transmission at the end of the infection period only;  
 43 experiment 2: continuous transmission.

| Traits                | Experiment | All        |              |                          |                          | Low density            |                          | Intermediate density     |                          | High density             |                             |
|-----------------------|------------|------------|--------------|--------------------------|--------------------------|------------------------|--------------------------|--------------------------|--------------------------|--------------------------|-----------------------------|
|                       |            | DIC        |              | HPDI                     |                          |                        |                          |                          |                          |                          |                             |
|                       |            | No density | Density      | genetic covariance (G)   | residual covariance (R)  | genetic covariance (G) | residual covariance (R)  | genetic covariance (G)   | residual covariance (R)  | genetic covariance (G)   | residual covariance (R)     |
| Virulence vs $R_0$    | 1          | 6297       | <b>6187*</b> | -0.99, 0.99              | -0.20, 0.01              | -0.99, 0.99            | <b>0.12, 0.42</b><br>(+) | -0.99, 0.99              | -0.11, 0.22              | -0.99, 0.72              | <b>-0.38, -0.005</b><br>(-) |
|                       | 2          | 4936       | <b>4856*</b> | <b>0.97, 0.99</b><br>(+) | -0.11, 0.11              | na                     | na                       | <b>0.81, 0.99</b><br>(+) | <b>0.12, 0.17</b><br>(+) | <b>0.52, 0.99</b><br>(+) | <b>0.10, 0.27</b><br>(+)    |
| $R_0$ vs transmission | 2          | 3632       | 3632         | <b>0.94, 0.99</b><br>(+) | <b>0.99, 0.99</b><br>(+) | na                     | na                       | <b>0.48, 0.99</b><br>(+) | <b>0.99, 0.99</b><br>(+) | <b>0.81, 0.99</b><br>(+) | <b>0.99, 0.99</b><br>(+)    |

44  
45
